# Supplementary material for: Effectiveness of topical antibiotics in treating corals affected by Stony Coral Tissue Loss Disease
Source: PeerJ. 2020 Jun 9;8:e9289. doi: 10.7717/peerj.9289 (PMC7292019; doi:10.7717/peerj.9289)
Supplement: Supplemental Information 1 [file peerj-08-9289-s001.xlsx]

## Sheet: Sheet1
							By Species/Treatment			By Treatment
TAG	Species	Treatment	Monitoring Date	# Effective	# Ineffective	% Effective	# Effect	# Ineffect	% Effect	# Effect	# Ineffect	% Effect
966	CNAT	control	2019-11-15	0	1	0
1360	CNAT	control	2019-11-15	0	7	0	0	8	0
1368	MCAV	control	2019-11-08	0	3	0
1370	MCAV	control	2019-11-08	0	1	0	0	4	0
914	OFAV	control	2019-11-08	0	3	0
922	OFAV	control	2019-11-08	0	1	0	0	4	0	0	16	0
1376	CNAT	New Base	2019-11-15	0	1	0
1481	CNAT	New Base	2019-11-08	0	1	0	0	2	0
85	MCAV	New Base	2019-11-08	0	1	0
1354	MCAV	New Base	2019-11-15	0	1	0
1482	MCAV	New Base	2019-11-08	0	4	0	0	6	0
1356	OFAV	New Base	2019-11-08	0	2	0
1467	OFAV	New Base	2019-11-08	1	10	0.0909091
1489	OFAV	New Base	2019-11-08	0	6	0	1	18	0.0526316	1	26	0.037037
1484	CNAT	New + Amoxi	2019-11-15	1	0	1
1352A	CNAT	New + Amoxi	2019-11-08	1	5	0.166667	2	5	0.285714
1465	MCAV	New + Amoxi	2019-11-08	2	0	1
1466	MCAV	New + Amoxi	2019-11-08	2	0	1	4	0	1
1485	OFAV	New + Amoxi	2019-11-08	0	2	0
1486	OFAV	New + Amoxi	2019-11-08	5	0	1
1490	OFAV	New + Amoxi	2019-11-08	5	0	1	10	2	0.833333	16	7	0.695652
1002	CNAT	Base 2b Placebo	2019-11-08	3	4	0.428571
1016	CNAT	Base 2b Placebo	2019-11-08	0	1	0	3	5	0.375
984	DLAB	Base 2b Placebo	2019-11-15	1	0	1
988	DLAB	Base 2b Placebo	2019-11-15	0	1	0
994	DLAB	Base 2b Placebo	2019-11-08	0	1	0
1388	DLAB	Base 2b Placebo	2019-11-15	0	4	0
1390	DLAB	Base 2b Placebo	2019-11-15	0	1	0	1	7	0.125
1385	MCAV	Base 2b Placebo	2019-11-15	0	3	0
1386	MCAV	Base 2b Placebo	2019-11-15	0	1	0
1387	MCAV	Base 2b Placebo	2019-11-15	0	5	0	0	9	0
350	OFAV	Base 2b Placebo	2019-11-15	0	1	0
396	OFAV	Base 2b Placebo	2019-11-08	0	1	0
1004	OFAV	Base 2b Placebo	2019-11-08	0	7	0
1010	OFAV	Base 2b Placebo	2019-11-08	0	4	0
1014	OFAV	Base 2b Placebo	2019-11-08	0	1	0	0	14	0
986	PSTR	Base 2b Placebo	2019-11-08	0	3	0
990	PSTR	Base 2b Placebo	2019-11-15	0	1	0
992	PSTR	Base 2b Placebo	2019-11-08	0	1	0
1389	PSTR	Base 2b Placebo	2019-11-15	0	3	0	0	8	0	4	43	0.0851064
1352B	CNAT	Base 2b + Amoxi	2019-11-08	2	1	0.666667	2	1	0.666667
180	DLAB	Base 2b + Amoxi	2019-11-15	2	0	1
980	DLAB	Base 2b + Amoxi	2019-11-08	4	0	1
1358	DLAB	Base 2b + Amoxi	2019-11-08	0	1	0
1391	DLAB	Base 2b + Amoxi	2019-11-15	1	0	1	7	1	0.875
452	MCAV	Base 2b + Amoxi	2019-11-15	1	0	1
1379	MCAV	Base 2b + Amoxi	2019-11-15	0	1	0
1383	MCAV	Base 2b + Amoxi	2019-11-15	1	0	1
1384	MCAV	Base 2b + Amoxi	2019-11-15	2	0	1
1430	MCAV	Base 2b + Amoxi	2019-11-08	4	0	1	8	1	0.888889
362	OFAV	Base 2b + Amoxi	2019-11-15	3	1	0.75
974	OFAV	Base 2b + Amoxi	2019-11-15	3	1	0.75
1380	OFAV	Base 2b + Amoxi	2019-11-15	7	0	1
1444	OFAV	Base 2b + Amoxi	2019-11-08	3	0	1
1483	OFAV	Base 2b + Amoxi	2019-11-08	5	0	1	21	2	0.913043
388	PSTR	Base 2b + Amoxi	2019-11-15	2	0	1
972	PSTR	Base 2b + Amoxi	2019-11-15	2	0	1
978	PSTR	Base 2b + Amoxi	2019-11-15	5	1	0.833333
1378	PSTR	Base 2b + Amoxi	2019-11-15	1	0	1
1400	PSTR	Base 2b + Amoxi	2019-11-15	1	0	1
1446	PSTR	Base 2b + Amoxi	2019-11-08	0	3	0	11	4	0.733333	49	9	0.844828
